# Supplementary material for: Sarcopenia Is a Prognostic Factor in Patients Undergoing Percutaneous Endoscopic Gastrostomy
Source: MDPI journal article supplement (doi:10.3390/jcm12103360), 2023-05-09
Supplement: s1 [file s1]

## Supplementary Table S1

### Difference in background characteristics of the patients with or without underlying pneumonia

| Factor                   |                     | Underlying pneumonia |             | <i>P</i> value |
|--------------------------|---------------------|----------------------|-------------|----------------|
|                          |                     | Yes                  | No          |                |
| N                        |                     | 55                   | 72          |                |
| Sex, n (%)               | Female              | 13 (23.6)            | 25 (34.7)   | 0.06           |
|                          | Male                | 42 (76.4)            | 47 (65.3)   |                |
| Age, mean (SD)           | years               | 77.4 (12.3)          | 69.6 (15.5) | 0.003          |
| BMI, mean (SD)           | kg/m <sup>2</sup>   | 19.1 (3.9)           | 20.9 (4.1)  | 0.02           |
| L3-SMI, mean (SD)        |                     | 32.9 (7.9)           | 34.2 (10.2) | 0.4            |
| Total protein, mean (SD) | g/dL                | 6.3 (0.7)            | 6.3 (0.9)   | 0.6            |
| Serum albumin, mean (SD) | g/dL                | 2.74 (0.6)           | 3.06 (0.6)  | 0.002          |
| Serum ChE, mean (SD)     | U/L                 | 165 (55)             | 213 (83)    | <0.001         |
| Serum CRP, mean (SD)     | mg/dL               | 1.7 (2.0)            | 1.4 (2.5)   | 0.5            |
| PNI, mean (SD)           |                     | 34.3 (6.8)           | 37.5 (7.4)  | 0.01           |
| Hemoglobin, mean (SD)    | g/dL                | 11.1 (1.8)           | 11.5 (2.0)  | 0.2            |
| Platelet, mean (SD)      | ×10 <sup>9</sup> /L | 22.9 (7.2)           | 25.8 (13.7) | 0.2            |
| WBC, mean (SD)           | ×10 <sup>9</sup> /L | 6.6 (2.5)            | 6.8 (2.6)   | 0.7            |
| TLC, mean (SD)           | ×10 <sup>9</sup> /L | 1.4 (0.7)            | 1.4 (0.6)   | 0.9            |

L3-SMI, skeletal muscle mass index at the third lumbar level; SD, standard deviation; BMI, body mass index; TC, total cholesterol; ChE, Choline esterase; CRP, C-reactive protein; PNI, Onodera's prognostic nutritional index; WBC, white blood cell count; and TLC, total lymphocyte count.

## Supplementary Table S2

### A. Sensitivity analysis for the cut-off values of L3-SMI

Iritani et al. [J Gastroenterol 2015;50(3):323-332] proposed different L3-SMI cut-off values in Japanese individuals ( $\leq 29.0 \text{ cm}^2/\text{m}^2$  for women;  $\leq 36.0 \text{ cm}^2/\text{m}^2$  for men). The Cox proportional hazard model analysis based on Iritani's cut-off value showed that low L3-SMI remained an independent risk factor for short survival as well as hypoalbuminemia.

| Variables                                  | Univariate analysis |         | Multivariate analysis (BIC) * |         | Multivariate analysis (AIC) † |         |
|--------------------------------------------|---------------------|---------|-------------------------------|---------|-------------------------------|---------|
|                                            | HR (95% CI)         | P value | Adjusted HR (95% CI)          | P value | Adjusted HR (95% CI)          | P value |
| L3-SMI, low (Iritani's cut-off value)      | 2.6 (1.6 – 4.4)     | <0.001  | 2.6 (1.5 – 4.4)               | <0.001  | 2.5 (1.4 – 4.2)               | 0.0013  |
| Sex, male                                  | 1.8 (1.0 – 3.3)     | 0.046   | ( - )                         |         | 1.9 (1.0 – 3.5)               | 0.047   |
| Age, per year                              | 1.9 (1.2 – 3.2)     | 0.01    | ( - )                         |         | ( - )                         |         |
| BMI, per $\text{kg}/\text{m}^2$            | 0.94 (0.89 – 1.0)   | 0.049   | ( - )                         |         | ( - )                         |         |
| Serum albumin, per g/dL                    | 0.34 (0.21 – 0.56)  | <0.001  | 0.35 (0.21 – 0.57)            | <0.001  | 0.36 (0.22 – 0.60)            | <0.001  |
| TLC, $<1.5 \times 10^9/\text{L}$           | 1.8 (1.0 – 3.0)     | 0.040   | ( - )                         |         | 1.6 (0.91 – 2.7)              | 0.10    |
| Serum CRP, $\geq 1.0 \text{ mg}/\text{dL}$ | 0.34 (0.21 – 0.56)  | <0.001  | ( - )                         |         | ( - )                         |         |
| Underlying pneumonia                       | 1.9 (1.1 – 3.2)     | 0.02    | ( - )                         |         | ( - )                         |         |

\* Explanatory variables were selected using Bayesian information criterion. HR, hazard ratio; † Explanatory variables were selected using Akaike information criterion. BIC, Bayesian information criterion; AIC, Akaike information criterion; HR, hazard ratio; CI, confidence interval; L3-SMI, Skeletal muscle mass index at the third lumbar level; BMI, body mass index; CRP, C-reactive protein; PNI, Onodera's prognostic nutritional index; WBC, white blood cell count; and TLC, total lymphocyte count.

## B. Sensitivity analysis for the binarization of the explanatory variables

In the main analyses, we converted the continuous variables of ‘total lymphocyte count’ and ‘C-reactive protein’ to binary variables according to a previous study, whereas albumin level was incorporated into the model as a continuous variable. The optimal cut-off values for binarization in our cohort, however, were not known, and several have suggested binarizing albumin with a cut-off value of 2.5 g/dL. Here, we performed a Cox proportional hazard analysis (a) without and, conversely, (b) with binarizing albumin level. The results suggested that low L3-SMI remained an independent risk factor for short survival regardless of the binarization of the explanatory variables.

### (a) Cox proportional hazard analysis without binarizing continuous variables

| Variables                  | Univariate analysis |                | Multivariate analysis (BIC) |                | Multivariate analysis (AIC) |                |
|----------------------------|---------------------|----------------|-----------------------------|----------------|-----------------------------|----------------|
|                            | HR (95% CI)         | <i>P</i> value | Adjusted HR (95% CI)        | <i>P</i> value | Adjusted HR (95% CI)        | <i>P</i> value |
| L3-SMI, low                | 2.8 (1.6 – 4.8)     | <0.001         | 3.0 (1.7 – 5.2)             | <0.001         | 3.1 (1.7 – 5.4)             | <0.001         |
| Sex, male                  | 1.8 (1.0 – 3.3)     | 0.046          | 2.0 (1.1 – 3.7)             | 0.03           | 2.0 (1.1 – 3.7)             | 0.031          |
| Age, per year              | 1.9 (1.2 – 3.2)     | 0.019          | ( - )                       |                | ( - )                       |                |
| BMI, per kg/m <sup>2</sup> | 0.94 (0.89 – 1.0)   | 0.049          | ( - )                       |                | ( - )                       |                |
| Serum albumin, per g/dL    | 0.34 (0.21 – 0.56)  | <0.001         | 0.34 (0.21 – 0.55)          | <0.001         | 0.36 (0.22 – 0.60)          | <0.001         |
| TLC, per /μL               | 1.0 (1.0 – 1.0)     | 0.11           | ( - )                       |                | 1.0 (1.0 – 1.0)             | 0.15           |
| Serum CRP, per mg/dL       | 1.1 (1.1 – 1.2)     | 0.0010         | ( - )                       |                | ( - )                       |                |
| Underlying pneumonia       | 1.9 (1.1 – 3.2)     | 0.018          | ( - )                       |                | ( - )                       |                |

\* Explanatory variables were selected using Bayesian information criterion. HR, hazard ratio; † Explanatory variables were selected using Akaike information criterion. BIC, Bayesian information criterion; AIC, Akaike information criterion; HR, hazard ratio; CI, confidence interval; L3-SMI, Skeletal muscle mass index at the third lumbar level; BMI, body mass index; CRP, C-reactive protein; PNI, Onodera’s prognostic nutritional index; WBC, white blood cell count; and TLC, total lymphocyte count.

(b) Cox proportional hazard analysis with binarizing the serum albumin level

| Variables                     | Univariate analysis |                | Multivariate analysis (BIC) * |                | Multivariate analysis (AIC) † |                |
|-------------------------------|---------------------|----------------|-------------------------------|----------------|-------------------------------|----------------|
|                               | HR (95% CI)         | <i>P</i> value | Adjusted HR (95% CI)          | <i>P</i> value | Adjusted HR (95% CI)          | <i>P</i> value |
| L3-SMI, low                   | 2.8 (1.6 – 4.8)     | <0.001         | 3.2 (1.8 – 5.7)               | <0.001         | 2.9 (1.6 – 5.1)               | <0.001         |
| Sex, male                     | 1.8 (1.0 – 3.3)     | 0.046          | ( - )                         |                | 1.8 (0.92 – 3.3)              | 0.091          |
| Age, per year                 | 1.9 (1.2 – 3.2)     | 0.01           | ( - )                         |                | 1.0 (1.0 – 1.0)               | 0.11           |
| BMI, per kg/m <sup>2</sup>    | 0.94 (0.89 – 1.0)   | 0.049          | ( - )                         |                | ( - )                         |                |
| Serum albumin, <2.5 mg/dL     | 2.6 (1.5 – 4.5)     | <0.001         | ( - )                         |                | 1.9 (0.98 – 3.5)              | 0.057          |
| TLC, <1.5 ×10 <sup>9</sup> /L | 1.8 (1.0 – 3.0)     | 0.040          | 2.1 (1.1 – 3.8)               | 0.019          | 1.6 (0.90 – 2.8)              | 0.11           |
| Serum CRP, ≥1.0 mg/dL         | 0.34 (0.21 – 0.56)  | <0.001         | 2.2 (1.3 – 3.9)               | 0.0059         | 1.9 (1.0 – 3.5)               | 0.047          |
| Underlying pneumonia          | 1.9 (1.1 – 3.2)     | 0.02           | ( - )                         |                | ( - )                         |                |

\* Explanatory variables were selected using Bayesian information criterion. HR, hazard ratio; † Explanatory variables were selected using Akaike information criterion. HR, hazard ratio; CI, confidence interval; L3-SMI, Skeletal muscle mass index at the third lumbar level; BMI, body mass index; CRP, C-reactive protein; PNI, Onodera's prognostic nutritional index; WBC, white blood cell count; and TLC, total lymphocyte count.

### C. Sensitivity analysis for the selection method for explanatory variables

As primary analyses, we applied the Bayesian information criterion as the selection method for explanatory variables. Here, we performed variable selection methods using **(a)** Akaike information criterion, and *P*-value in univariate analysis of under **(b)** 0.1, **(c)** 0.05, and **(d)** 0.01. The results suggested that low L3-SMI remained an independent risk factor for short survival regardless of the selection method.

#### (a) Cox proportional hazard analysis with variable selection method using Akaike information criterion

| Variables                     | Univariate analysis |                | Multivariate analysis (AIC) |                |
|-------------------------------|---------------------|----------------|-----------------------------|----------------|
|                               | HR (95% CI)         | <i>P</i> value | Adjusted HR (95% CI)        | <i>P</i> value |
| L3-SMI, low                   | 2.8 (1.6 – 4.8)     | <0.001         | 2.9 (1.6 – 5.1)             | <0.001         |
| Sex, male                     | 1.8 (1.0 – 3.3)     | 0.046          | 2.0 (1.1 – 3.7)             | 0.030          |
| Age, per year                 | 1.9 (1.2 – 3.2)     | 0.01           | ( - )                       |                |
| BMI, per kg/m <sup>2</sup>    | 0.94 (0.89 – 1.0)   | 0.049          | ( - )                       |                |
| Serum albumin, per g/dL       | 0.34 (0.21 – 0.56)  | <0.001         | 0.36 (0.21 – 0.59)          | <0.001         |
| TLC, <1.5 ×10 <sup>9</sup> /L | 1.8 (1.0 – 3.0)     | 0.040          | 1.6 (0.91 – 2.8)            | 0.10           |
| Serum CRP, ≥1.0 mg/dL         | 2.5 (1.5 – 4.1)     | <0.001         | ( - )                       |                |
| Underlying pneumonia          | 1.9 (1.1 – 3.2)     | 0.02           | ( - )                       |                |

HR, hazard ratio; † Explanatory variables were selected using Akaike information criterion. AIC, Akaike information criterion; HR, hazard ratio; CI, confidence interval; L3-SMI, Skeletal muscle mass index at the third lumbar level; BMI, body mass index; CRP, C-reactive protein; PNI, Onodera's prognostic nutritional index; WBC, white blood cell count; and TLC, total lymphocyte count.

**(b)** Cox proportional hazard analysis with variable selection method using P-value in univariate analysis of under 0.1 and 0.05

There was no difference in results between a P-value threshold of 0.05 and 0.1 because no variable had a P-value in the range of 0.05 to 0.1 in the univariate analysis.

| Variables                     | Univariate analysis |                | Multivariate analysis (AIC) |                |
|-------------------------------|---------------------|----------------|-----------------------------|----------------|
|                               | HR (95% CI)         | <i>P</i> value | Adjusted HR (95% CI)        | <i>P</i> value |
| L3-SMI, low                   | 2.8 (1.6 – 4.8)     | <0.001         | 2.2 (1.2 – 4.3)             | 0.014          |
| Sex, male                     | 1.8 (1.0 – 3.3)     | 0.046          | 1.9 (0.97 – 3.7)            | 0.062          |
| Age, per year                 | 1.9 (1.2 – 3.2)     | 0.01           | 1.0 (0.99 – 1.0)            | 0.30           |
| BMI, per kg/m <sup>2</sup>    | 0.94 (0.89 – 1.0)   | 0.049          | 0.97 (0.90 – 1.0)           | 0.35           |
| Serum albumin, per g/dL       | 0.34 (0.21 – 0.56)  | <0.001         | 0.49 (0.27 – 0.89)          | 0.019          |
| TLC, <1.5 ×10 <sup>9</sup> /L | 1.8 (1.0 – 3.0)     | 0.040          | 1.4 (0.81 – 2.5)            | 0.23           |
| Serum CRP, ≥1.0 mg/dL         | 2.5 (1.5 – 4.1)     | <0.001         | 1.6 (0.82 – 2.9)            | 0.18           |
| Underlying pneumonia          | 1.9 (1.1 – 3.2)     | 0.02           | 1.0 (0.57 – 1.8)            | 0.96           |

\* HR, hazard ratio; † Explanatory variables were selected using Akaike information criterion. AIC, Akaike information criterion; HR, hazard ratio; CI, confidence interval; L3-SMI, Skeletal muscle mass index at the third lumbar level; BMI, body mass index; CRP, C-reactive protein; PNI, Onodera's prognostic nutritional index; WBC, white blood cell count; and TLC, total lymphocyte count.

(c) Cox proportional hazard analysis with variable selection method using P-value in univariate analysis of under 0.01

| Variables                     | Univariate analysis |                | Multivariate analysis (AIC) <sup>†</sup> |                |
|-------------------------------|---------------------|----------------|------------------------------------------|----------------|
|                               | HR (95% CI)         | <i>P</i> value | Adjusted HR (95% CI)                     | <i>P</i> value |
| L3-SMI, low                   | 2.8 (1.6 – 4.8)     | <0.001         | 2.8 (1.6 – 5.0)                          | <0.001         |
| Sex, male                     | 1.8 (1.0 – 3.3)     | 0.046          | ( - )                                    |                |
| Age, per year                 | 1.9 (1.2 – 3.2)     | 0.01           | ( - )                                    |                |
| BMI, per kg/m <sup>2</sup>    | 0.94 (0.89 – 1.0)   | 0.049          | ( - )                                    |                |
| Serum albumin, per g/dL       | 0.34 (0.21 – 0.56)  | <0.001         | 0.42 (0.24 – 0.73)                       | 0.0020         |
| TLC, <1.5 ×10 <sup>9</sup> /L | 1.8 (1.0 – 3.0)     | 0.040          | ( - )                                    |                |
| Serum CRP, ≥1.0 mg/dL         | 2.5 (1.5 – 4.1)     | <0.001         | 1.1 (0.98 – 1.2)                         | 0.15           |
| Underlying pneumonia          | 1.9 (1.1 – 3.2)     | 0.02           | ( - )                                    |                |

HR, hazard ratio; <sup>†</sup> Explanatory variables were selected using Akaike information criterion. AIC, Akaike information criterion; HR, hazard ratio; CI, confidence interval; L3-SMI, Skeletal muscle mass index at the third lumbar level; BMI, body mass index; CRP, C-reactive protein; PNI, Onodera's prognostic nutritional index; WBC, white blood cell count; and TLC, total lymphocyte count.

D. Sensitivity analysis for the covariate balancing propensity score-based analysis

We investigated the fluctuation of the main values of survival analysis when propensity score was used as a covariate instead of matching.

| Variables   | Univariate analysis |                | Multivariate analysis       |                |
|-------------|---------------------|----------------|-----------------------------|----------------|
|             | HR (95% CI)         | <i>P</i> value | HR adjusted for PS (95% CI) | <i>P</i> value |
| L3-SMI, low | 2.6 (1.4 – 4.6)     | 0.001          | 2.2 (1.2 – 4.1)             | 0.007          |

\* P-value was calculated by Cox proportional hazard model using two explanatory variables of L3-SMI and propensity score. The propensity score was calculated using the variables of ‘underlying pneumoniae (yes/no)’, ‘sex (male/female)’, ‘age (years)’, ‘serum albumin level (g/dL)’, ‘C-reactive protein level (mg/dL)’, ‘total lymphocyte count (/μL)’. HR, hazard ratio; CI, confidence interval; PS, propensity score; and L3-SMI, Skeletal muscle mass index at the third lumbar level
